# Supplementary material
Source: MDPI journal article supplement (https://www.mdpi.com/2071-1050/12/22/9745)
Supplement: s1 [file s1]

### **Management Sample**

#### **Management Levels**

|        |     |     |
|--------|-----|-----|
| Senior | 20% | 87  |
| Middle | 30% | 130 |
| Junior | 50% | 218 |

#### **Gender**

|         |     |     |
|---------|-----|-----|
| Male    | 65% | 283 |
| Females | 35% | 153 |

#### **Years with LUX Resort**

|                   |        |     |
|-------------------|--------|-----|
| 1-2 years         | 12.7%  | 55  |
| 3-5 years         | 59.4 % | 259 |
| More than 5 years | 27. 9% | 121 |

### **Employees**

#### **Gender**

|         |     |     |
|---------|-----|-----|
| Males   | 45% | 196 |
| Females | 55% | 240 |

#### **Length of Employment with LUX**

|                   |        |     |
|-------------------|--------|-----|
| 1 to 2 years      | 21.5%  | 94  |
| 3-5 years         | 55.6%  | 242 |
| More than 5 years | 22.1 % | 96  |

### **Customers**

#### **Gender**

Male 46% = 201; Female 52% =227 Other =9

#### **Resorts where customers were**

|         |       |     |
|---------|-------|-----|
| HLR     | 9.7%  | 42  |
| LGG     | 13.3% | 58  |
| LLM     | 13.3% | 57  |
| LSAA    | 27.3% | 119 |
| LSG     | 8.5%  | 37  |
| MB      | 12.1% | 53  |
| TAM     | 13.9% | 61  |
| MISSING | 1.8%  | 8   |
